# Supplementary material for: A systematic study on the prevention and treatment of retinopathy of prematurity in China
Source: PubMed Central journal article supplement (PMC5813392; doi:10.1186/s12886-018-0708-3), 2018-02-14
Supplement: 12886_2018_708_MOESM1_ESM.pdf [file 12886_2018_708_MOESM1_ESM.pdf]

Number □□□□-□□

(Municipal and county administrative division code-  
institution serial number)

## Investigation on the prevention situation and influencing factors of ROP for medical institutions

Investigation area: \_\_\_\_\_ City \_\_\_\_\_ District (County)

Name of investigation institution: \_\_\_\_\_

Signature \_\_\_\_\_; Contact number \_\_\_\_\_; Date \_\_\_\_\_

### 1. General information of hospital

#### 1.1 Hospital class:

primary hospital     secondary hospital     tertiary hospital     undecided

#### 1.2 Hospital grade:

special-grade hospital     grade A     grade B     undecided

#### 1.3 Administrative level of hospital:

ministerial and provincial-level     prefecture-level     district-level     county-level

### 2. ROP prevention situation

Status of Neonatology Department and Neonatal Intensive Care Unit (NICU):

Established time of Neonatology Department \_\_\_\_\_, Established time of NICU \_\_\_\_\_

#### 2.1 The number of beds and service (Filling with numbers of year 2012)

Hospitalized patients of Neonatology Department: \_\_\_\_\_ cases

Total number of beds of Neonatology Department: \_\_\_\_\_ beds, including number of  
beds of NICU \_\_\_\_\_ beds

Total number of beds of Obstetrics Department: \_\_\_\_\_ beds, annual delivery number \_\_\_\_\_

#### ROP related service in 2012:

Annual receive and cure number of premature babies: \_\_\_\_\_ cases

< 2500g (low-birth weight infant, LBW): \_\_\_\_\_cases

< 2000g (including very/extremely low birth weight infant): \_\_\_\_\_cases

< 1500g (very low birth weight infant, VLBW): \_\_\_\_\_cases

< 1000g (extremely low birth weight infant, ELBW): \_\_\_\_\_cases

## **2.2 Personnel and training (Filling with numbers of year 2012)**

Numbers of doctors engaged in ROP screening: \_\_\_\_\_(if 'no', fill in 0)

### **ROP related training:**

Neonatal physician \_\_\_\_\_person-time/year; Ophthalmologist \_\_\_\_\_person-time/year

Hospital administrators \_\_\_\_\_person-time/year

## **2.3 Gross area of Neonatology Department (Filling with numbers of year 2012)**

Total area \_\_\_\_\_m<sup>2</sup>, including NICU \_\_\_\_\_m<sup>2</sup>

## **2.4 Specialized apparatuses of Neonatology Department (If 'yes', fill in the counts)**

Negative pressure aspirator:  yes  no phototherapy box:  yes  no

induction equipment (non-contact):  yes  no mask:  yes  no

neonatal rescue platform:  yes  no incubator:  yes  no

recovery capsule:  yes  no infusion pump:  yes  no

island of life:  yes  no bedside X-ray machine:  yes  no

transit cases:  yes  no high frequency ventilator:  yes  no

conventional mechanical ventilator:  yes  no nasal CPAP ventilator:  yes  no

monitor:  yes  no hypothermia therapy apparatus:  yes  no

Nitric oxide therapy apparatus:  yes  no transport ventilators :  yes  no

infant hyperbaric oxygen chamber:  yes  no laryngoscope:  yes  no

glucometer:  yes  no

T-piece resuscitator (accorded with 2011 recovery guidelines requirements):  yes  no

## **2.5 ROP related equipment (If 'yes', fill in the counts)**

oxygen-air mixer:  yes  no oxygen concentration meter:  yes  no

blood-gas analyzer:  yes  no

oxygen saturation monitor (Any containing oxygen saturation determination):  yes  no

direct ophthalmoscopy:  yes  no indirect ophthalmoscopy:  yes  no

fundus digital camera:  yes  no condensing therapy apparatus :  yes  no

RatCam III: yes no fundus laser treatment instrument: yes no

Other diagnostic equipment for ROP \_\_\_\_\_

**Newborn resuscitation equipment in the delivery room and operating room:**

oxygen-air mixer: yes no compressed air: yes no

T-piece resuscitator (accorded with 2011 recovery guidelines requirements): yes no

nosocomial transshipment: transport incubator: yes no

**Emergency transport equipment (Fill in when hospital carries out newborn transshipment)**

compressed air: yes no compressed oxygen: yes no

transport ventilators : yes no transport incubator: yes no

infusion pump: yes no vehicle-mounted power interface : yes no

vacuum device: yes no monitor: yes no

oxygen-air mixer: yes no

T-piece resuscitator (accorded with 2011 recovery guidelines requirements): yes no

**2.6 Technical projects undertaken**

fiberoptic bronchoscopy: yes no cardiopulmonary monitoring: yes no

bedside blood gas analysis: yes no double change: yes no

bedside cardiac color ultrasound: yes no bedside radiography: yes no

spiral CT vascular airway reconstruction: yes no MRI: yes no

mild hypothermia therapy: yes no ROP screening and treatment: yes no

umbilical arteriovenous catheterization: yes no PICC: yes no

invasive artery blood pressure monitoring: yes no CRRT: yes no

peritoneal dialysis: yes no renal biopsy: yes no

esophageal PH value determination: yes no NO inhalation therapy: yes no

PS replacement therapy: yes no mechanical ventilation: yes no

high frequency oscillatory ventilation: yes no

noninvasive nasal congestion assisted ventilation: yes no

high flow oxygen therapy: yes no

closed thoracic drainage: yes no neonatal screening: yes no

neonatal surgery: yes no pediatric cardiothoracic surgery: yes no

**2.7 ROP prevention situation:**

2.7.1 Conducting oxygen therapy monitoring:  yes  no

2.7.2 Conducting ROP screening:  yes  no

Reasons for not carrying out ROP screening:

- Personnel shortage
- Space limitation
- Consider unnecessary
- Insufficient input and output
- Funding shortage
- Lack of concern
- Consider referral safer
- Others \_\_\_\_\_

Time for carrying out ROP screening: \_\_\_\_\_

Forms of screening cooperation:  conducted by doctors inside the hospital  engaging experts outside the hospital  referral to other hospital

Total number of ROP screening cases in 2010 \_\_\_\_\_, positive cases \_\_\_\_\_

Positive cases over  period \_\_\_\_\_, including  period cases \_\_\_\_\_,  period cases \_\_\_\_\_

Total number of ROP screening cases in 2011 \_\_\_\_\_, positive cases \_\_\_\_\_

Positive cases over  period \_\_\_\_\_, including  period cases \_\_\_\_\_,  period cases \_\_\_\_\_

Total number of ROP screening cases in 2012 \_\_\_\_\_, positive cases \_\_\_\_\_

Positive cases over  period \_\_\_\_\_, including  period cases \_\_\_\_\_,  period cases \_\_\_\_\_

2.7.3 ROP related referral and transshipment situation in the absence of ROP screening conditions:

- referral at birth
- referral when ROP is suspected
- no referral at any time

2.7.4 ROP treatment referral situation in the absence of ROP treatment conditions:

- immediate referral when ROP is screened
- referral when ROP threshold is screened
- no referral
- main institution of referral \_\_\_\_\_

2.7.5 Conducting ROP laser treatment in 2012:  yes  no

treatment cases \_\_\_\_\_ ROP dispute cases \_\_\_\_\_ ROP disputes (time, reason) \_\_\_\_\_

2.7.6 Conducting ROP condensate treatment in 2012:  yes  no

treatment cases: \_\_\_\_\_ cases of IV period ROP \_\_\_\_\_ cases of V period ROP \_\_\_\_\_

ROP treatment way:  separate  cooperative  others

cooperative hospital and its level \_\_\_\_\_, cooperative way \_\_\_\_\_

2.7.7 Will the exact time and place of ROP screening be informed when the premature was discharged from the hospital without screening or discharged automatically:  yes  no

2.7.8 ROP screening mode (Please choose suitable mode for your hospital and give a brief explanation)

Mode 1:  In cooperation with other hospitals to carry out ROP screening

Mode 2:  Conducted by trained ophthalmologists inside the hospital

Mode 3:  Executing diagnosis by ophthalmologist after fundus examination conducted by neonatal physician

Reason 1:  No condition for ROP screening inside the hospital

Reason 2:  Resource sharing

Reason 3:  Ensure screening quality, including timeliness, accuracy and screening rate

Reason 4:  Others\_\_\_\_\_

### **3. A feasibility investigation on the prevention and management mode of retinopathy of premature**

The prevention and management mode of ROP, as one of the previous research results of our team, was designed based on the system management theory, as shown in the figure below. Please give brief advice on the existing problems and suggestions of the mode promotion in local area in combination with your own reality.

ROP prevention and management mode is as follows:

Health administrative agency and the provincial management center can formulate policies, system and goals, give support on the equipment and funding, cultivate ROP prevention professionals, and conduct quality evaluation and supervision on the regional ROP prevention institutions according to the reported information by network throughout the province.

Regional ROP prevention institutions, relied on the tertiary hospitals, can establish sound patient referral and consultation system and give guidance to the local hospitals for better ROP prevention. Department of neonatology and ophthalmology, in the context of a good cooperation, should work together on ROP screening, diagnosis, treatment and follow-up, while department of obstetrics and gynecology should make efforts for premature birth prevention, exhaustive pregnancy test and prenatal health education.

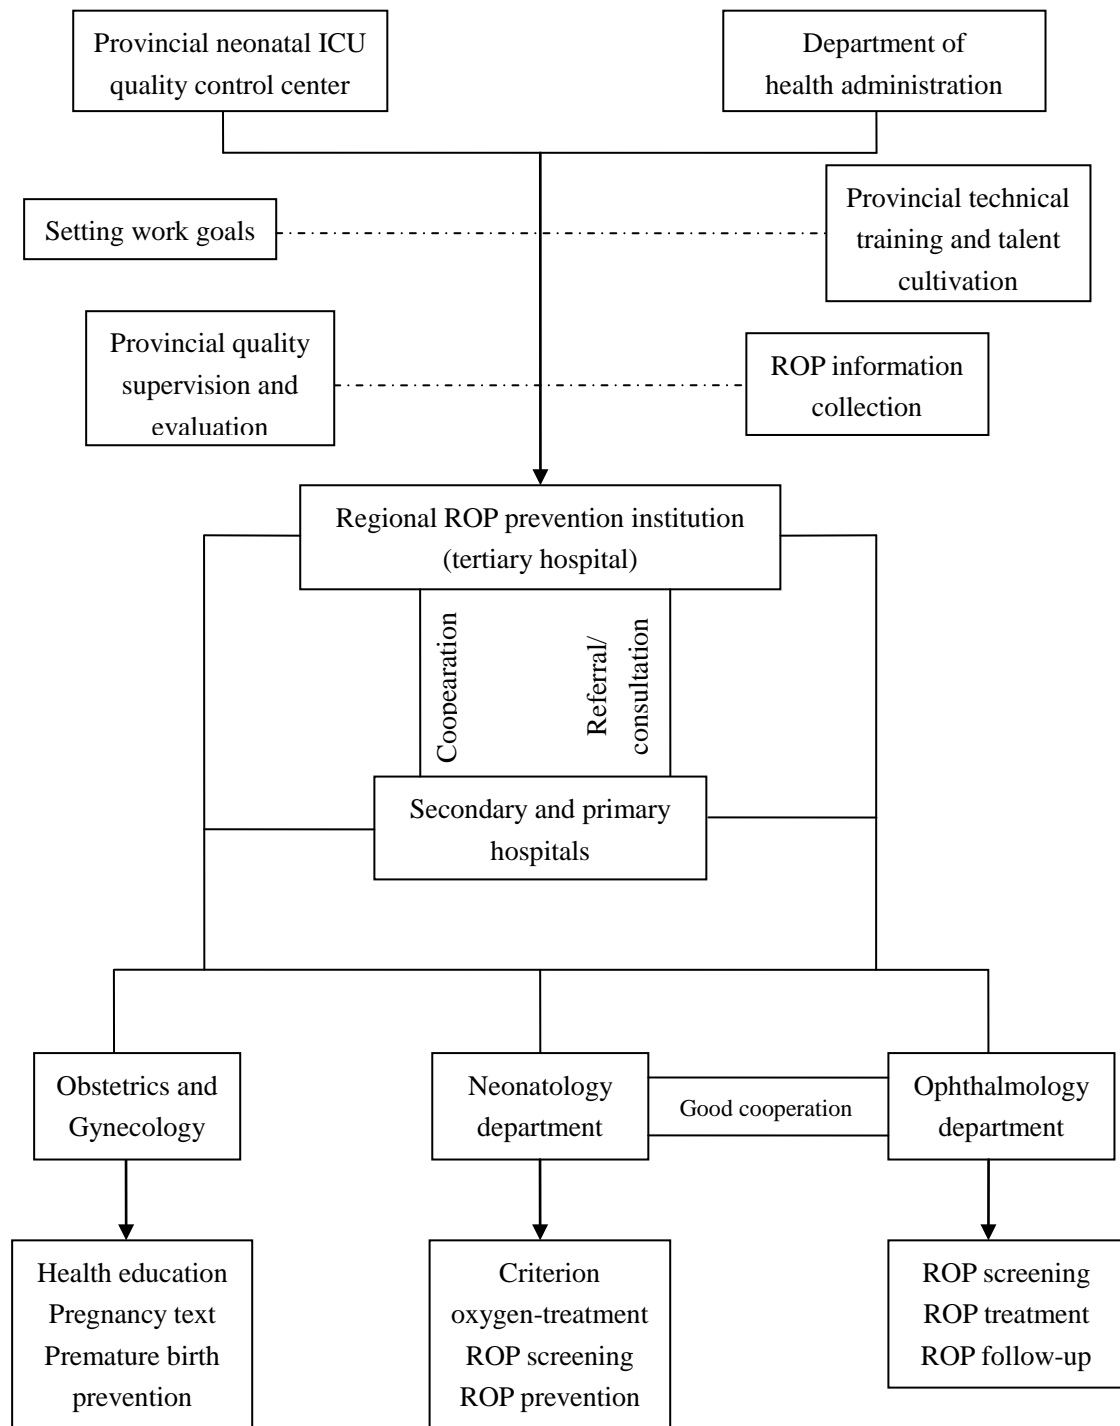

**Recommendations on the ROP prevention and management mode:**

1. What do you think of the operability of this mode ?
2. Do you think the mode is suitable for your own circumstances ?
3. Do you have any suggestions for revision on this mode ?
4. How many points will you give to this mode on a 100-point scale?
5. What do you think is the main barrier to the mode operation ?
