# Supplementary material for: A systematic study on the prevention and treatment of retinopathy of prematurity in China
Source: PubMed Central journal article supplement (PMC5813392; doi:10.1186/s12886-018-0708-3), 2018-02-14
Supplement: 12886_2018_708_MOESM2_ESM.pdf [file 12886_2018_708_MOESM2_ESM.pdf]

## **Investigation on the ROP prevention knowledge, attitude and behavior for medical staff**

The incidence of retinopathy of prematurity (ROP) have been rapidly increased in recent ten years in China and become one of the main causes of premature disability. So it is of great urgent to carry out systematic ROP prevention.

We conduct this survey to understand your knowledge and skills about ROP and to collect advice for strengthening ROP prevention and services. All the information you provide will be kept secret and used only for statistical analysis. This survey is completely voluntary and thanks for your participation and cooperation.

1. What is the administrative level of your hospital ?

- ministerial and provincial-level                       prefecture-level  
 district-level                                                       county-level

2. What is your job ?

- nurse                                                       neonatal physician                       ophthalmologist  
 administrative staff                       others

3. Is there ROP prevention guidelines in China?

- yes                       no                       I don't know

4. If you think there is ROP prevention guidelines, how do you know it?

- data inquiry                                               training course  
 department learning                       told by peer

5. What do you think of the implementation of the guidelines in your hospital ?

- implemented well                       partly implemented                       not implemented

6. What is the reason for not implementing the guidelines ?

- unnecessary                       no conditions

7. Have you ever got any ROP knowledge training ?

- yes                                               no

8. What kind of training have you taken ?

- ROP lectures on continue education training       thematic training for ROP
- attendance in advanced studies for ROP       others
9. Do you think it is necessary for training ?
- yes       no
10. Supervision situation of ROP by health administration department:
- yes (level of the health administration department\_\_\_\_\_ )       no
11. What do you think of the implementation of ROP screening in the medical institutions ?
- very important       important       so-so
- not important       I don't care
12. Does your hospital carry out ROP screening ?
- yes, it is carried out to the premature whose weight are below 2000g
- yes, it is carried out to the newborn who have been treated with oxygen
- no, never       I don't know       others
13. Have there any medical disputes related to ROP in your hospital ?
- yes       no       I don't know
14. What do you think is the main limitation for not carrying out ROP screening in some medical institutions ?
- lack of concern       personnel shortage       funding shortage
- apparatus shortage       unnecessary
15. How many years have your hospital implemented ROP screening ?
- < 1 year       1-2 years       2-3years
- >3 years       not implemented
16. How many doctors who have the capability of ROP screening in your hospital ?
- 0       1       2       3       ≥4
17. What is the job of the doctors who conduct retinal screening ?
- ophthalmologist       neonatal physician       physician of child healthcare
18. What is the source of the doctors who conduct ROP screening in your hospital ?
- recruit as required       training of existing medical staff

get support from other hospitals       never conducted ROP screening

19. Do you think it is necessary for establishing regional ROP screening center ?

absolutely necessary       necessary       a little

not necessary       I don't care

20. Which do you prefer to the function of the regional screening center ?

help train medical staff in the hospital

on-site professional guidance regularly

newborns transferred to the center to do screening

all the above

no need for a center

**Place:** \_\_\_\_\_ **City** \_\_\_\_\_ **District (County)**

**Institution:** \_\_\_\_\_

**Date:** \_\_\_\_\_
